# Supplementary material for: A highly efficient and thermally stable green phosphor (Lu2SrAl4SiO12:Ce3+) for full-spectrum white LEDs
Source: Royal Society of Chemistry journal article supplement (doi:10.1039/c8tc04101f), 2018-01-01
Supplement: c8tc04101f1.pdf [file c8tc04101f1.pdf]

## Supporting Information

### **A Highly Efficient and Thermally Stable Green Phosphor $\text{Lu}_2\text{SrAl}_4\text{SiO}_{12}:\text{Ce}^{3+}$ for Full-spectrum White LEDs**

Yu Xiao,<sup>a,b</sup> Wenge Xiao,<sup>\*c</sup> Liangliang Zhang,<sup>\*a</sup> Zhendong Hao,<sup>a</sup> Guo-Hui Pan,<sup>a</sup> Yang Yang,<sup>a,b</sup> Xia Zhang,<sup>a</sup> Jiahua Zhang<sup>\*a</sup>

a State Key Laboratory of Luminescence and Applications, Changchun Institute of Optics, Fine Mechanics and Physics, Chinese Academy of Sciences, 3888 Eastern South Lake Road, Changchun 130033, China

b University of Chinese Academy of Sciences, Beijing 100049, China

c College of Optical Science and Engineering, State Key Laboratory of Modern Optical Instrumentation, Zhejiang University, Hangzhou 310027, China

\*E-mail: wengsee@163.com

zhangliangliang@ciomp.ac.cn

zhangjh@ciomp.ac.cn

## 1.1 Experimental details

### 1.2 Materials synthesis

The samples,  $\text{Lu}_2\text{SrAl}_4\text{SiO}_{12}:\text{Ce}^{3+}$  (LSAS: $\text{Ce}^{3+}$ ), was prepared by the traditional high-temperature solid-state reaction. The starting materials  $\text{SrCO}_3$ (G.R.),  $\text{Lu}_2\text{O}_3$ (99.99%),  $\text{Al}_2\text{O}_3$ (G.R.) and  $\text{CeO}_2$ (99.99%) were weighted stoichiometrically according to the composition of  $\text{Lu}_{2(1-x)}\text{SrAl}_4\text{SiO}_{12}:x\text{Ce}^{3+}$  ( $x = 1\%, 4\%, 6\%, 8\%$  and  $10\%$ ). The raw materials were mixed thoroughly in an agate mortar, and then placed in an alumina crucible. These crucible were put into the tube furnace and sintered at  $1400\text{ }^\circ\text{C}$  for three hours in a reducing atmosphere of  $5\% \text{H}_2+95\% \text{N}_2$ , and then cooled down at the rate of  $5\text{ }^\circ\text{C}/\text{min}$ . Finally, all the samples were ground into powders for the following characterization.

### 1.3 Characterization

The element composition was analyzed by an energy-dispersive spectrometer coupled to a field emission scanning electron microscopy (FESEM, Hitachi, S-4800). The crystal structure was identified by X-ray power diffraction (XRD) on a Bruker D8 Focus diffractometer with Cu K $\alpha$  radiation ( $\lambda=1.54056\text{ \AA}$ ) operated at  $40\text{ kV}$  and  $40\text{ mA}$ . The XRD data were collected with step size of  $0.02^\circ$  and count time of  $2\text{ s/step}$  in the  $2\theta$  range from  $10^\circ$  to  $90^\circ$ . Structure refinement was conducted by the Rietveld method using the FullProf program. The photoluminescence (PL) and photoluminescence excitation (PLE) spectra were measured by Hitachi F-7000 spectrometer equipped with a  $150\text{ W}$  xenon lamp under a working voltage of  $700\text{ V}$ . The electroluminescence spectra, color rendering index, correlated color temperature (CCT) and luminous efficiency of the fabricated pc-WLEDs were obtained from an integrated test system (EVERFINE, China) including photoelectric characteristic testing system, high precision fast spectral radiometer (HAAS-2000), dc stabilized current power supply and a rotating integral ball. PL quantum efficiency (QE) was measured directly by the absolute PL quantum yield measurement system using a spectralon-coated integrating sphere (FL980, Edinburg Instruments, UK). The temperature-dependent PL spectra were obtained by the measurement system containing using a heating stage (Linkam THMS-600) and a QEPro high performance spectrometer (Ocean Optics) which gives the time-integrated intensities.

**Table S1. Rietveld refinement of LSAS:6%Ce<sup>3+</sup>**

| Temperature/K      | 300 K        |
|--------------------|--------------|
| Space group        | $Ia\bar{3}d$ |
| Lattice parameters |              |
| $a/\text{\AA}$     | 11.91417     |
| $b/\text{\AA}$     | 11.91417     |
| $c/\text{\AA}$     | 11.91417     |
| $V/\text{\AA}^3$   | 1691.187     |
| $R_p$ (%)          | 5.77         |
| $R_{wp}$ (%)       | 10.36        |
| $\chi^2$           | 4.84         |

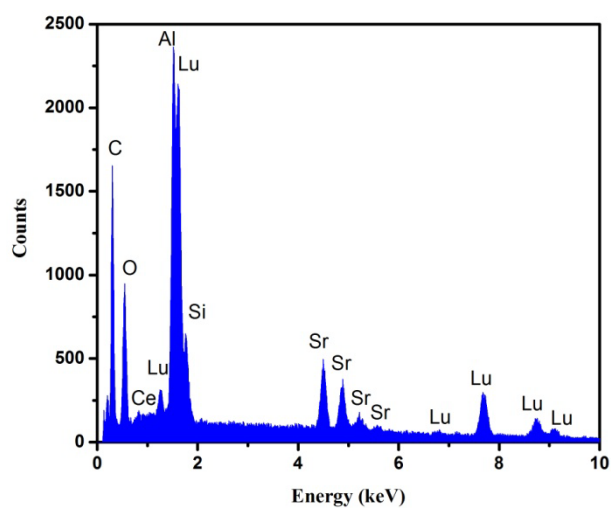**Fig. S1 EDS spectrum of LSAS:6%Ce<sup>3+</sup>****Table S2. The result of EDS analysis of LSAS:6%Ce<sup>3+</sup>**

| Element | wt%   | at%   |
|---------|-------|-------|
| Sr      | 12.32 | 06.50 |
| Lu      | 46.34 | 12.24 |
| Al      | 16.26 | 27.85 |
| Si      | 06.61 | 10.86 |
| O       | 14.25 | 41.17 |
| Ce      | 04.22 | 01.39 |

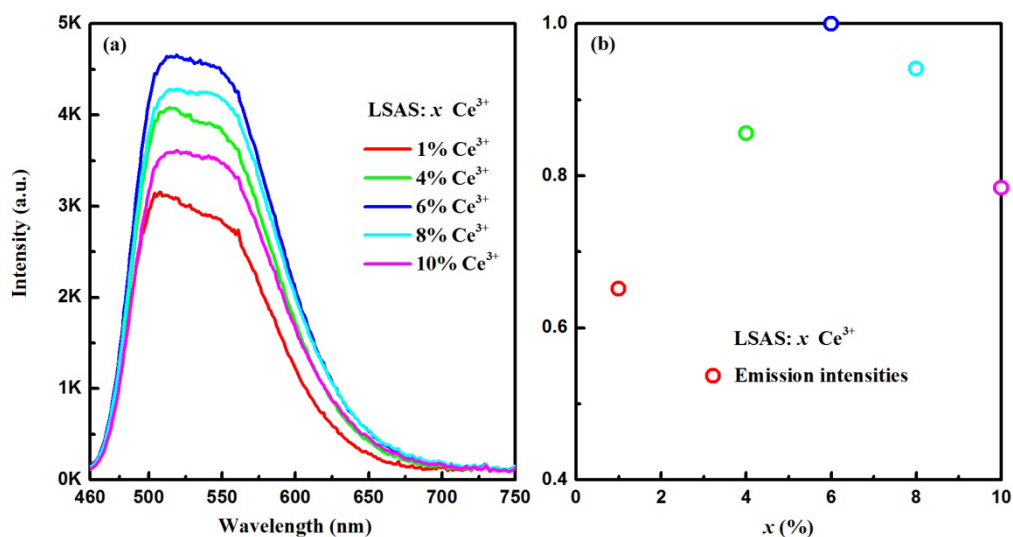

Fig. S2 PL spectra (a), and the dependence of PL intensities on Ce<sup>3+</sup> concentration for LSAS: x Ce<sup>3+</sup> (x=1%, 4%, 6%, 8% and 10%) under 448 nm excitation (b).

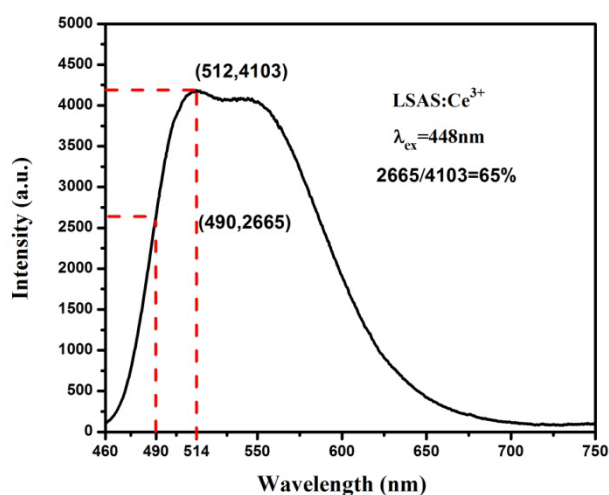

Fig. S3 The ratio of PL intensity at 490 nm to 514 nm under 448 nm excitation for LASA:Ce<sup>3+</sup>

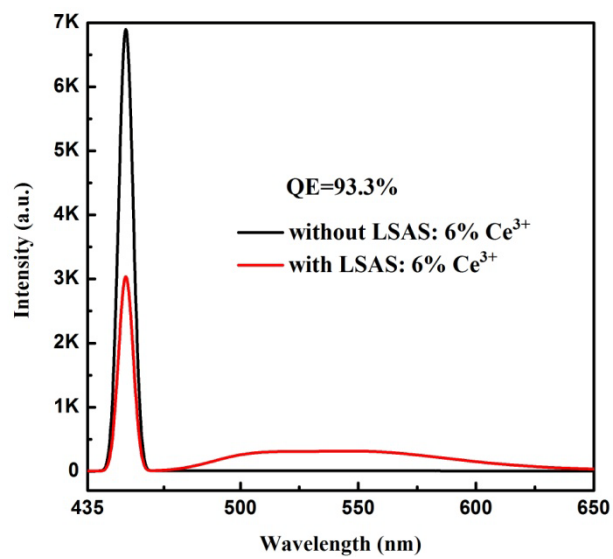

**Fig. S4** Emission spectra inside the integrating sphere without and with the LSAS:6%Ce<sup>3+</sup> phosphor upon 448 nm excitation.
